# Supplementary material
Source: PubMed Central journal article supplement (PMC2815196)
Supplement: NIHMS160239-supplement-02.pdf [file NIHMS160239-supplement-02.pdf]

**Supplemental Table 1.**  
**Taqman® Gene Expression Assays**

| <b>Target RNA</b> | <b>Taqman® Gene Expression Assay</b> | <b>Amplicon Length (bp)</b> |
|-------------------|--------------------------------------|-----------------------------|
| B2M               | Hs00187842_m1                        | 64                          |
| HPRT1             | Hs01003267_m1                        | 72                          |
| TBP               | Hs00427621_m1                        | 65                          |
| PSA               | Hs03063374_m1                        | 64                          |
| K18               | Hs01649353_g1                        | 67                          |
| NKX3.1            | Hs00171834_m1                        | 78                          |
| TIMP3             | Hs00155949_m1                        | 59                          |
| Desmin            | Hs01090880_m1                        | 69                          |
| IGF1              | Hs00153126_m1                        | 70                          |
| PCA3              | Hs01371939_g1                        | 52                          |
| AMACR             | Hs01091292_m1                        | 66                          |
| miR-44            | 4373384                              | NA                          |
| miR-48            | 4373383                              | NA                          |
| miR-125b          | 4373148                              | NA                          |
| miR-16            | 4373121                              | NA                          |

NA – not applicable, stem-loop RT-PCR
