# Supplementary material
Source: PubMed Central journal article supplement (PMC2815196)

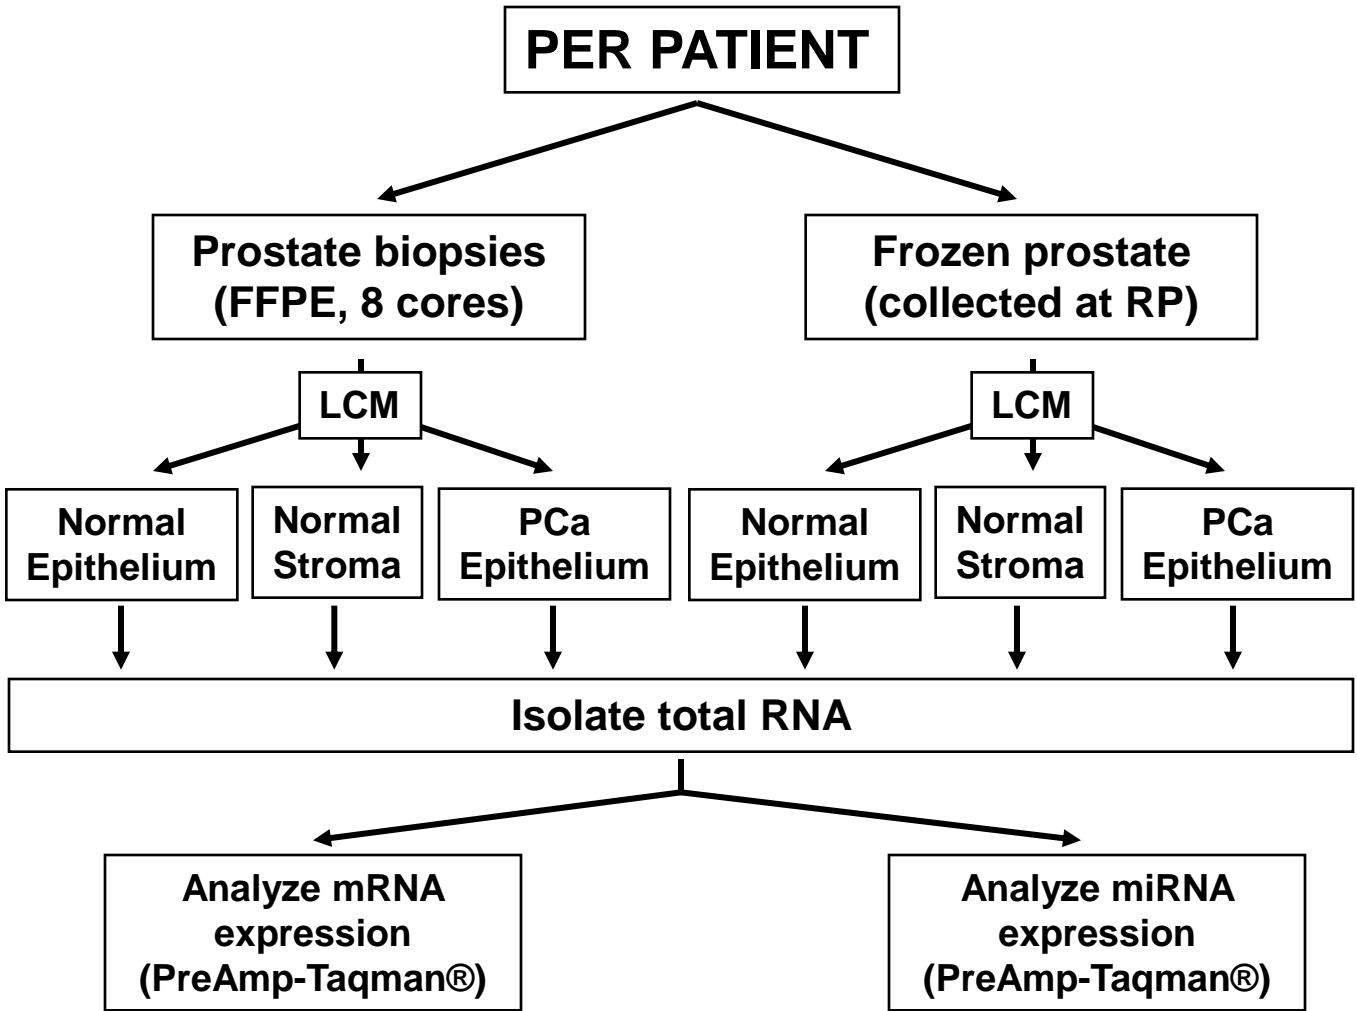

Supplemental Figure 1

Supplement: NIHMS160239-supplement-01.pdf [file NIHMS160239-supplement-01.pdf]
